# Supplementary material for: Glasgow Prognostic Score predicts chemotherapy‐triggered acute exacerbation‐interstitial lung disease in patients with non‐small cell lung cancer
Source: PubMed Central journal article supplement (PMC7919129; doi:10.1111/1759-7714.13792), 2021-01-21
Supplement: TCA-12-667-s001.pdf [file TCA-12-667-s001.pdf]

**Glasgow Prognostic Score predicts chemotherapy-triggered acute exacerbation-interstitial lung disease in patients with non-small cell lung cancer**

Ryota Kikuchi<sup>a</sup>, Hiroyuki Takoi<sup>a</sup>, Takao Tsuji<sup>b</sup>, Yoko Nagatomo<sup>a</sup>, Akane Tanaka<sup>a</sup>, Hayato Kinoshita<sup>a</sup>, Mariko Ono<sup>a</sup>, Mayuko Ishiwari<sup>a</sup>, Kazutoshi Toriyama<sup>a</sup>, Yuta Kono<sup>a</sup>, Yuki Togashi<sup>a</sup>, Kazuhiro Yamaguchi<sup>a</sup>, Akinobu Yoshimura<sup>c</sup>, Shinji Abe<sup>a,\*</sup>

**Supplementary Table S1.** Frequency of chemotherapy regimens during the clinical course

| <b>First line</b>                  | <b>N</b> | <b>Second line</b> | <b>N</b> | <b>Third line</b> | <b>N</b> | <b>Fourth line</b> | <b>N</b> | <b>Fifth line</b> | <b>N</b> |
|------------------------------------|----------|--------------------|----------|-------------------|----------|--------------------|----------|-------------------|----------|
| <b>(n = 56)</b>                    |          | <b>(n = 35)</b>    |          | <b>(n = 13)</b>   |          | <b>(n = 4)</b>     |          | <b>(n = 2)</b>    |          |
| CBDCA+PTX<br>with/without BEV      | 29       | DOC                | 19       | DOC+RAM           | 3        | DOC                | 1        | S-1               | 1        |
| CDDP/CBDCA+PEM<br>with/without BEV | 15       | PEM                | 8        | DOC               | 2        | VNR                | 1        | Nivo              | 1        |
| CBDCA+Nab-PTX                      | 6        | S-1                | 4        | PEM               | 2        | Nab-PTX            | 1        |                   |          |
| CBDCA+S1                           | 3        | CBDCA+<br>PTX      | 1        | Nivo              | 2        | Nivo               | 1        |                   |          |
| CDDP/CBDCA+VNR                     | 2        | VNR                | 1        | VNR               | 1        |                    |          |                   |          |
| CDDP+ETP                           | 1        | Nivo               | 1        | Nab-PTX           | 1        |                    |          |                   |          |
|                                    |          | Pembrolizumab      | 1        | S-1               | 1        |                    |          |                   |          |
|                                    |          |                    |          | Atezolizumab      | 1        |                    |          |                   |          |

N, number; CBDCA, carboplatin; PTX, paclitaxel; BEV, bevacizumab; DOC, docetaxel; RAM, ramucirumab; CDDP, cisplatin; PEM, pemetrexed; VNR, vinorelbine; Nivo, nivolumab; Nab-PTX, nanoparticle albumin-bound paclitaxel; ETP, etoposide.

**Supplementary Table S2.** Incidence of chemotherapy triggered AE-ILD in each chemotherapy regimen

| <b>Chemotherapy</b>      | <b>Incidence of AE</b> |
|--------------------------|------------------------|
| Platinum agents (n = 57) | 4 (7.0%)               |
| PTX (n = 30)             | 1 (3.3%)               |
| DOC (n = 25)             | 8 (32%)                |
| PEM (n = 25)             | 3 (12%)                |
| S-1 (n = 9)              | 0 (0%)                 |
| Nab-PTX (n = 8)          | 0 (0%)                 |
| VNR (n = 6)              | 0 (0%)                 |
| Others (n = 8)           | 0 (0%)                 |

AE, acute exacerbation; ILD, interstitial lung disease; PTX, paclitaxel; DOC, docetaxel; PEM, pemetrexed; Nab-PTX, nanoparticle albumin-bound paclitaxel; VNR, vinorelbine; ETP, etoposide. Others: Nivolumab (n = 5), Pembrolizumab (n = 1), Atezolizumab (n = 1), ETP (n = 1)

**Supplementary Table S3.** Univariate analysis of overall survival in patients who underwent carbon monoxide diffusing capacity (n = 21)

| Variable                               | Univariate analysis |           |                |
|----------------------------------------|---------------------|-----------|----------------|
|                                        | HR                  | 95% CI    | <i>p</i> value |
| <b>%predicted DLCO, per %increment</b> | 1.016               | 0.99–1.03 | 0.155          |

HR, hazard ratio; CI, Confidence interval; DLCO, carbon monoxide diffusing capacity.

**Supplementary Fig. S1.** Patient recruitment flow chart. NSCLC, non-small cell lung cancer; ILD, interstitial lung disease; GPS, Glasgow Prognostic Score.

**Supplementary Table S1.** Frequency of chemotherapy regimens during the clinical course.

**Supplementary Table S2.** Incidence of chemotherapy triggered AE-ILD in each chemotherapy.

**Supplementary Table S3.** Univariate analysis of overall survival in patients who underwent carbon monoxide diffusing capacity.
